# Supplementary material
Source: PubMed Central journal article supplement (PMC3477783)
Supplement: NIHMS65334-supplement-2.pdf [file NIHMS65334-supplement-2.pdf]

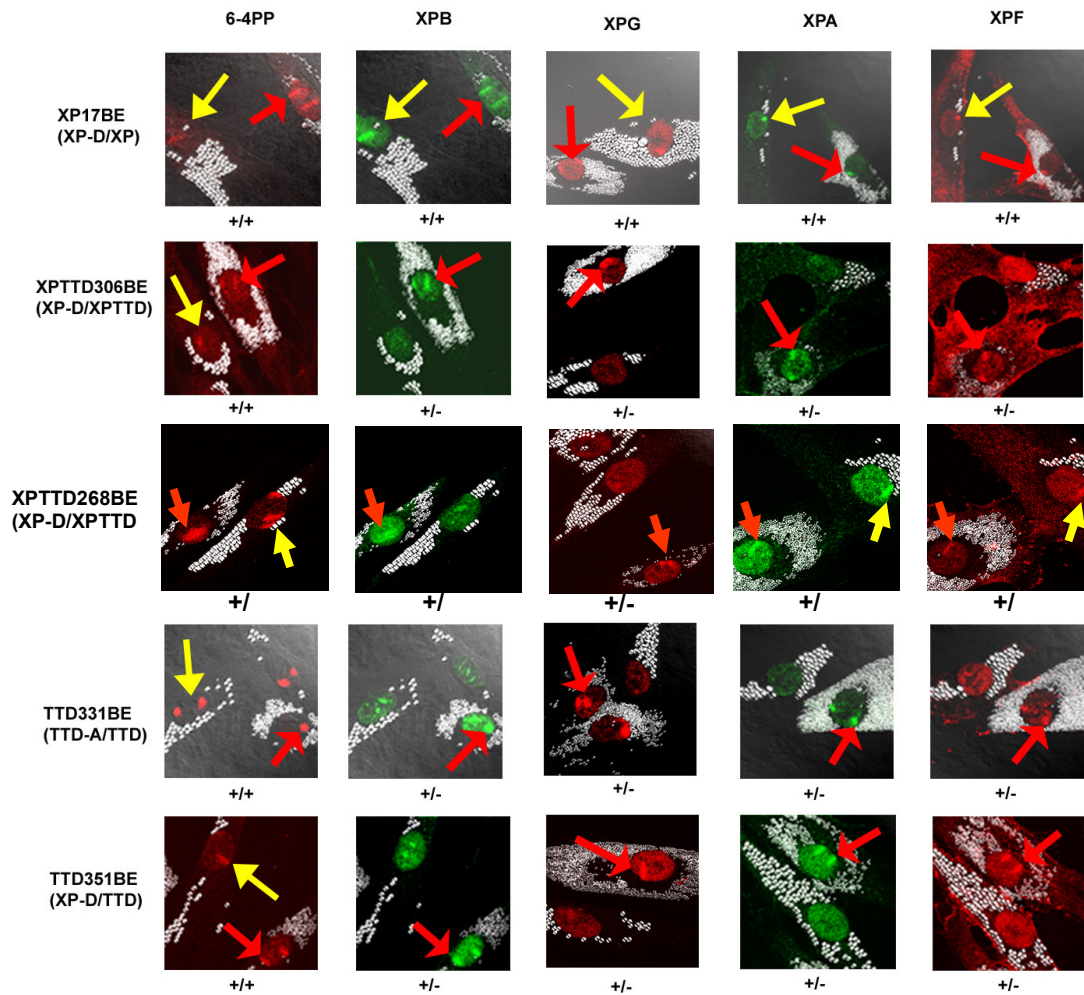

**Supplemental Figure S1. Recruitment of NER proteins XPB, XPG, XPA, and XPF to localized UV damage 0.5h post UV-irradiation.** Cells were labeled with latex beads as for Figure 2. Cells were fixed 0.5h post-irradiation and immunostained for 6-4PP, XPB, XPG, XPA, and XPF. The arrows indicate sites of localized immunostaining: normal - red arrows, patient - yellow arrows. Symbols below each image indicate localization (+) or non-localization (-) of NER proteins or photoproducts in normal cells/patient cells. Details as for Figure 2.

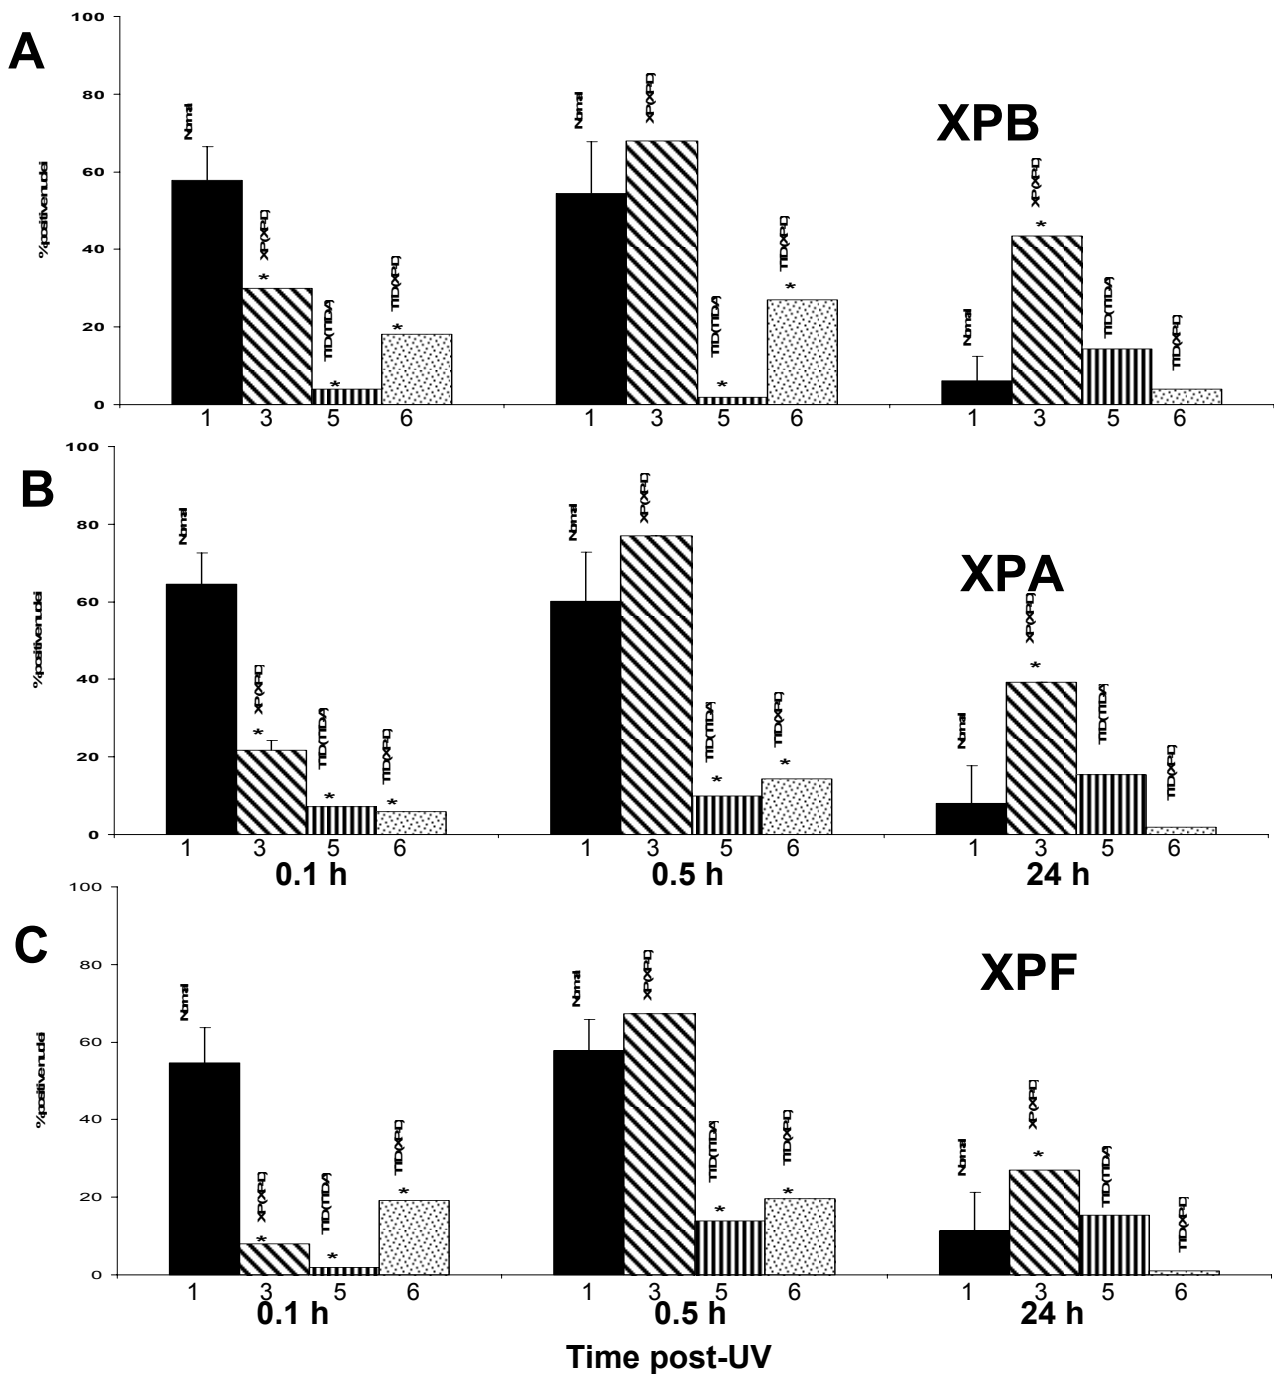

**Supplemental Figure S2. Frequency of XPB, XPA and XPF NER protein localization in XP and TTD cells at 0.1h, 0.5h, and 24h following UV irradiation.** Experimental details as in Figure 3. A. XPB localization B. XPA localization, C. XPF localization. Where shown, error bars indicate the standard error of the mean of at least 2 independent counts. \*  $p < 0.001$  significant difference between patient cell count and normal cell count at the equivalent time post-irradiation. Bar numbers: 1-AG13145, 3-XP17BE, 5-TTD331BE, and 6-TTD351BE.

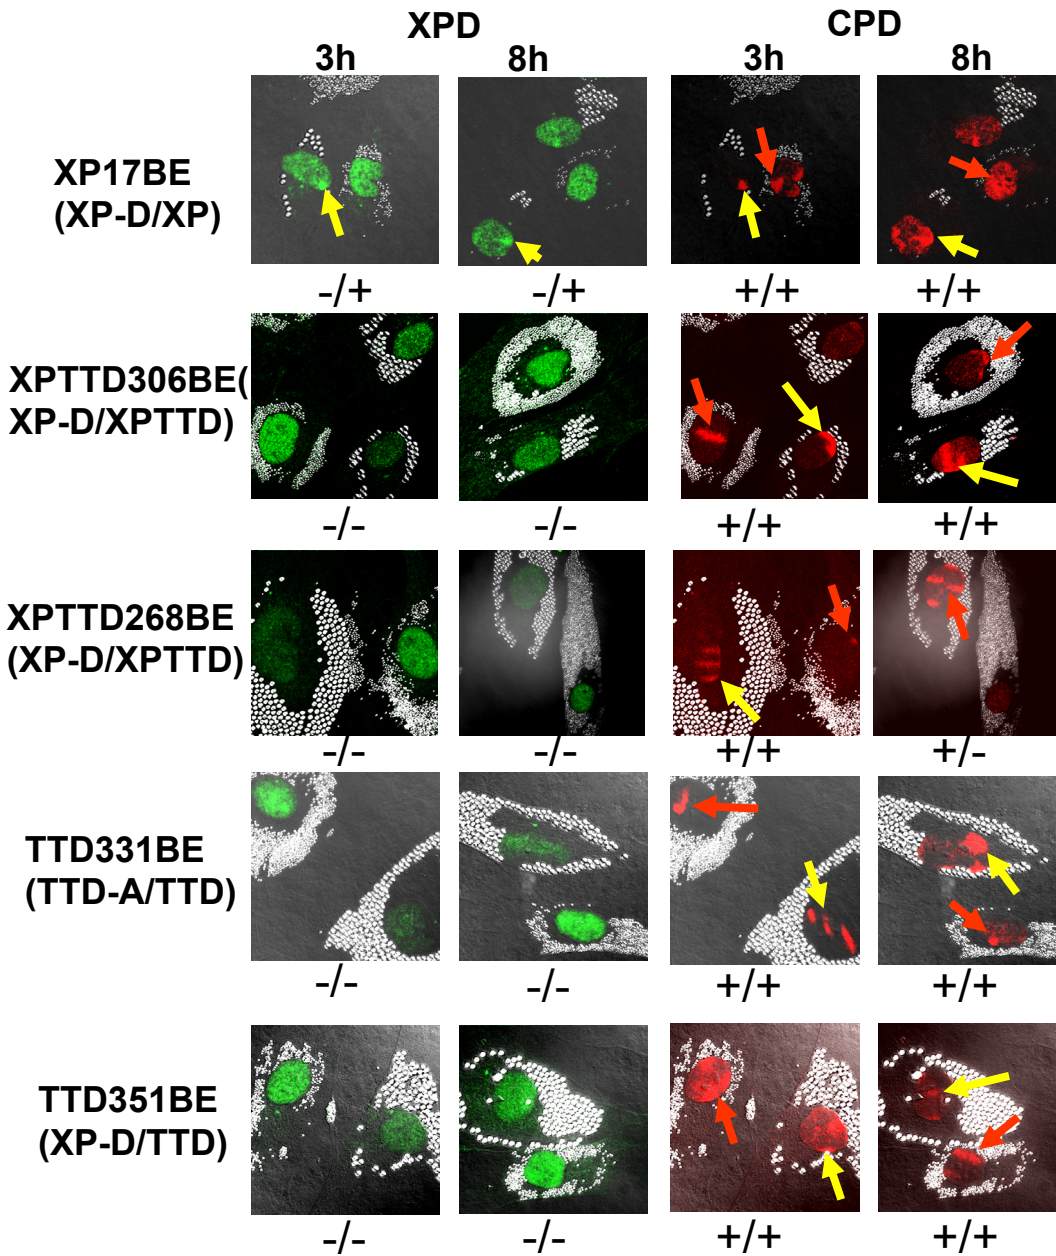

**Supplemental Figure S3. Persistent localization of XPD in XP (XP-D) and non-localization of XPD in TTD (XP-D and TTD-A) and XP/TTD (XP-D) cells 3h and 8h following UV irradiation.** Cells were labeled with latex beads as for Figure 2. Cells were fixed 3h and 8h post-irradiation and immunostained for CPD and XPD. The arrows indicate sites of localized immunostaining: normal - red arrows, patient - yellow arrows. Symbols below each image indicate localization (+) or non-localization (-) of NER proteins or photoproducts in normal cells/patient cells. Details as for Figure 2.

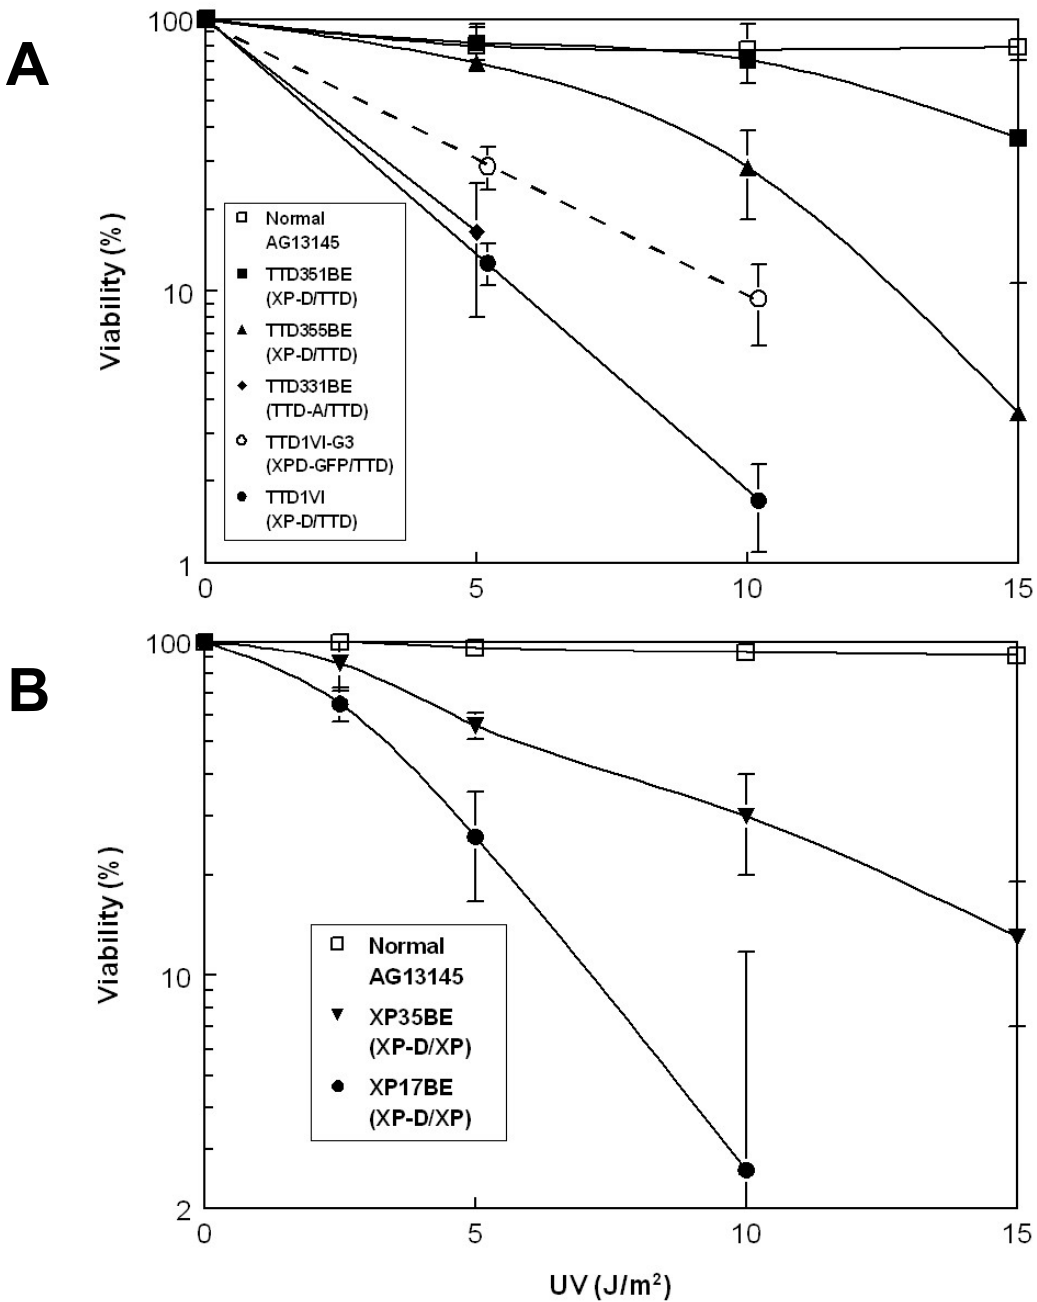

**Supplemental Figure S4. Post UV-viability of TTD, XP and normal cell lines.** Cell cultures were exposed to the indicated dose of UV and post-UV viability was assessed after 4 days using an MTS assay. **A.** Normal (AG13145), TTD351BE (XP-D/TTD), TTD355BE (XP-D/TTD), TTD331BE (TTD-A/TTD), TTD1VI (SV40 transformed XP-D/TTD) and TTD1VI-G3 (SV40 transformed XP-D/TTD transfected with XPD-GFP) cells. **B.** Normal (AG13145), XP35BE (XP-D/XP) and XP17BE (XP-D/XP) cells.
